# Supplementary material
Source: publisher figshare collection journal article supplement (https://geolsoc.figshare.com/ndownloader/files/5421863)
Supplement: Supplementary file 1 [file 5421863]

	Group I rocks in Gürün						Group II rocks in Gürün
	Volcanic rocks						Dyke		Volcanic rocks
Sample	G138	G144	G146	G147	G148		G131		G132	G133	G134	G135	G136	G137	G140	G141	G142	G143	G145
GPS	37S 0310705/4261292	37S 0305043/4264284	37S 0304465/4264876	37S 0304465/4264876	37S 0304465/4264876		37S 0310860/4263072		37S 0310979/4262724	37S 0310979/4262724	37S 0310979/4262724	37S 0310979/4262724	37S 0310979/4262724	37S 0310979/4262724	37S 0306593/4264605	37S 0306593/4264605	37S 0306593/4264605	37S 0306593/4264605	37S 0304465/4264876
Locality	Limestone blocks in the melange, chert-radiolarite association belonging to Gulbahar and lava flows	Daglica, pillow breccia with pelagic lmst and chert.	From Daglica to Kirkkisrak pillow lavas	From Daglica to Kirkkisrak pillow lavas	From Daglica to Kirkkisrak pillow lavas		Sö?ütdere-Armutalan-Da?lica direction, dykes in harzburgites		Melange unit between Daglica and Armutalan village, pillow lavas in the melange	Melange unit between Daglica and Armutalan village, pillow lavas in the melange	Melange unit between Daglica and Armutalan village, pillow lavas in the melange	Melange unit between Daglica and Armutalan village, pillow lavas in the melange	Melange unit between Daglica and Armutalan village, pillow lavas in the melange	Melange unit between Daglica and Armutalan village, pillow lavas in the melange	At the entrance of Daglica (W of Daglica), pelagic lmst and pillow lava intercalations.	At the entrance of Daglica (W of Daglica), pelagic lmst and pillow lava intercalations.	At the entrance of Daglica (W of Daglica), pelagic lmst and pillow lava intercalations.	At the entrance of Daglica (W of Daglica), pelagic lmst and pillow lava intercalations.	From Daglica to Kirkkisrak, pillow lavas
